# Supplementary material
Source: PubMed Central journal article supplement (PMC11590500)
Supplement: NIHMS1996641-supplement-1.pdf [file NIHMS1996641-supplement-1.pdf]

**SUPPORTING INFORMATION****Robotic bronchoscopic needle based confocal laser endomicroscopy to diagnose peripheral lung nodules**

Christopher J. Manley<sup>1</sup>, Tess Kramer<sup>2</sup>, Rohit Kumar<sup>1</sup>, Yulan Gong<sup>3</sup>, Hormoz Ehya<sup>3</sup>, Eric Ross<sup>4</sup>, Peter I. Bonta<sup>2</sup>, Jouke T. Annema<sup>2</sup>

<sup>1</sup> Department of Pulmonary and Critical Care, Fox Chase Cancer Center, Philadelphia, PA, USA

<sup>2</sup> Department of Respiratory Medicine, Amsterdam UMC, Amsterdam, Netherlands

<sup>3</sup> Department of Pathology, Fox Chase Cancer Center, Philadelphia, PA, USA

<sup>4</sup> Department of Biostatistics and Bioinformatics, Fox Chase Cancer Center, Philadelphia, PA, USA

**Appendix S1-METHODS**

In approximately 15 minutes, five raters (two pulmonologists, two pathologists and one researcher) were trained in nCLE malignancy and airway/lung parenchyma criteria. No raters had been involved in the data acquisition or analysis. One rater was experienced with the nCLE malignancy and airway/lung parenchyma criteria (expert), 2 raters were experienced with probe-based CLE-imaging (in the thorax and bladder) but inexperienced with nCLE-malignancy and airway/lung parenchyma (semi-expert) and 2 raters were completely nCLE-naïve (non-expert).

Of the 54 obtained nCLE videos, 6 nCLE videos were used for training purposes and 26 videos (n=15 airway/lung parenchyma, n=11 malignancy) for validation purposes (32/54, 59%). Blinded raters distinguished nCLE-videos of malignancy from airway/lung parenchyma with an overall sensitivity and specificity of 91.9% respectively (Table 1). Of the nCLE videos scored with good confidence (n=157, 60%), 97% were rated correctly, compared to 88% and 72% in videos with moderate (n=74, 28%) or poor confidence (n=29, 11%). The experienced rater had an overall accuracy of 96.2%, compared to 93.3% with semi-expert raters and 88.5% with non-expert raters. The IOA and IOR between the five raters were substantial (Table 2). All individual nCLE malignancy and airway/lung parenchyma criteria were recognized with moderate or substantial agreement (Table 2). The nCLE malignancy criteria 'enlarged pleomorphic cells' and 'dark clumps' were present in 42% and 40% of the validation videos, compared to 12% for 'directional streaming'. Of the nCLE airway/lung parenchyma criteria, 'still image' was present in 31% of the validation videos, compared to 20% for 'elastin fibers', 16% for 'bronchial epithelium' and 11% for 'alveoli'.

**Table S1. Scoring performances of blinded raters (n=5) for the distinction of malignant nCLE-videos from airway/lung parenchyma.**

|                          | Accuracy | Sensitivity | Specificity | NPV  | PPV  |
|--------------------------|----------|-------------|-------------|------|------|
| All raters (n=5)         | 91.9     | 91.9        | 91.9        | 93.8 | 89.5 |
| Expert (n=1 rater)       | 96.2     | 90.9        | 100         | 93.8 | 100  |
| Semi-expert (n=2 raters) | 93.3     | 93.2        | 93.3        | 94.9 | 91.1 |
| Non-expert (n=2 raters)  | 88.5     | 91.1        | 86.4        | 92.7 | 83.7 |

In 20 patients, 26 nCLE-videos were selected and scored twice by five raters (total of 260 ratings). nCLE, needle based confocal laser endomicroscopy; NPV, negative predictive value; PPV, positive predictive value

**Table S2. Interobserver agreement and intra-observer reliability for the final diagnosis and nCLE malignancy and airway/lung parenchyma criteria**

| Final diagnosis                      | K-value          |
|--------------------------------------|------------------|
| IOA                                  | 0.80 (0.71-0.81) |
| IOR (SD)                             | 0.80±0.05        |
| nCLE malignancy criteria             |                  |
| Enlarged pleomorphic cells           | 0.79 (0.71-0.87) |
| Dark clumps                          | 0.70 (0.62-0.78) |
| Directional streaming                | 0.63 (0.54-0.73) |
| nCLE airway/lung parenchyma criteria |                  |
| Alveoli                              | 0.46 (0.37-0.55) |
| Elastin fibers                       | 0.68 (0.60-0.77) |
| Still image                          | 0.76 (0.68-0.84) |
| Bronchial epithelium                 | 0.72 (0.63-0.81) |

In 20 patients, 26 nCLE-videos were selected and scored twice by five raters (total of 260 ratings). The data are presented as the IOA  $\kappa$  (95%CI) unless specified otherwise. Landis-Koch interpretation system: poor <0.2, fair 0.21-0.4, moderate 0.41-0.6, substantial 0.61-0.8 and excellent 0.81-1. IOA, inter-observer agreement; IOR, intra-observer reliability; nCLE, needle based confocal laser endomicroscopy.
